# Supplementary material for: Increased Tc17 cell levels and imbalance of naïve/effector immune response in Parkinson’s disease patients in a two-year follow-up: a case control study
Source: PubMed Central journal article supplement (PMC8422782; doi:10.1186/s12967-021-03055-2), 2021-09-06

**Supplementary Figure 1.** Analysis strategy for CD4, CD8, and CD19 cells. In all cases, a singlet region, named as R1, was selected. Starting from this region, a forward vs scatter dot plot was created, defining a new region for the targeted cells (lymphocytes or plasma cells) which was named as R2. **A. CD4 T cells.** starting from R2, a new CD4<sup>+</sup> window was created and named as R3. From R3, a new CD25 vs. CD127 window was created; CD4<sup>+</sup>CD25<sup>-</sup>CD127<sup>-</sup> cells were defined as effector CD4 T cells, while CD4<sup>+</sup>CD25<sup>-</sup>CD127<sup>+</sup> cells were defined as naïve/central memory CD4 T cells. In another sample tube, starting from R2, a CD4 vs. CD25 window was created; from the double-positive region, a new IL-10 vs. TGF- $\beta$  window was created; CD4<sup>+</sup>CD25<sup>+</sup>IL-10<sup>-</sup>TGF- $\beta$ <sup>-</sup> cells were defined as activated CD4 non-Tregs. **B. CD8 T cells.** Starting from R2, a new CD8 vs. CD45RO window was created; from CD8<sup>+</sup>CD45RO<sup>-</sup>, a new IL-10 vs. CCR7 window was created; CD8<sup>+</sup>CD45RO<sup>-</sup>CCR7<sup>+</sup>IL-10<sup>-</sup> cells were defined as naïve CD8 non-Tregs. From the CD8<sup>+</sup>CD45RO<sup>+</sup> cells, three windows of CCR7 vs. IL-10 were generated; CD8<sup>+</sup> CD45RO<sup>+</sup> CCR7<sup>-</sup> cells were defined as effector memory CD8; CD8<sup>+</sup>CD45RO<sup>+</sup>CCR7<sup>+</sup> cells were defined as central memory CD8, while CD8<sup>+</sup> CD45RO<sup>+</sup>CCR7<sup>-</sup>IL-10<sup>-</sup> cells were defined as effector memory CD8 non-Tregs. In another sample tube, starting from R2, a new CD8 vs. CD28 window was created; double-positive cells were defined as like-activated CD8 T cells. From R2, a new CD8 vs. CD161 window was created; CD8<sup>+</sup>CD161<sup>HI</sup> cells were defined as invariant, mucosa-associated-like cells (MAIT-like). From R2, a new CD8<sup>+</sup> window was created and named as R3. From R3, a new CD56 vs. CD161 window was created; CD8<sup>+</sup>CD56<sup>+</sup>CD161<sup>+</sup> cells were defined as NKT cells. **C. CD8 T cytotoxic cells.** The analysis of Tc cells was made in different tubes (one tube for each population). In all three cases, the gating strategy followed the same pattern. Starting from R2, a new CD8<sup>+</sup> window was created and named as R3. From R3, a new window considering transcription factor vs. the corresponding cytokine was created; the following phenotypes were defined with this strategy: Tc1 (CD8<sup>+</sup>TBET<sup>+</sup>IFN- $\gamma$ <sup>+</sup> or CD8<sup>+</sup>TBET<sup>+</sup>TNF- $\alpha$ <sup>+</sup>), Tc2 (CD8<sup>+</sup>GATA-3<sup>+</sup>IL-13<sup>+</sup> or CD8<sup>+</sup>GATA-3<sup>+</sup>IL-4<sup>+</sup>), and Tc17 (CD8<sup>+</sup>ROR- $\gamma$ <sup>+</sup>IL-17<sup>+</sup>). **D. B cells.** Starting from R2, a new CD19<sup>-</sup> region was generated and named as R4. Starting from R4, a new CD138 vs. CD38 window was generated; CD19<sup>-</sup>CD138<sup>+</sup> CD38<sup>+</sup> cells were defined as plasma cells. From R2, a new CD19 vs. CD138 window was generated; CD138<sup>+</sup> cells were selected, and the expression of IL-10 was measured in this region;

CD138+IL-10+ were defined as L-10+ plasma cells. Also, from R2, a new CD19 vs. CD38 window was created; double-positive cells were defined as activated B cells. In a different sample tube, starting from R2, a new CD19 vs. CD1d window was generated; CD19+CD1d+ cells were defined as lipid-antigen presenting (Lip-AP) B cells.

# A. CD4 T cells

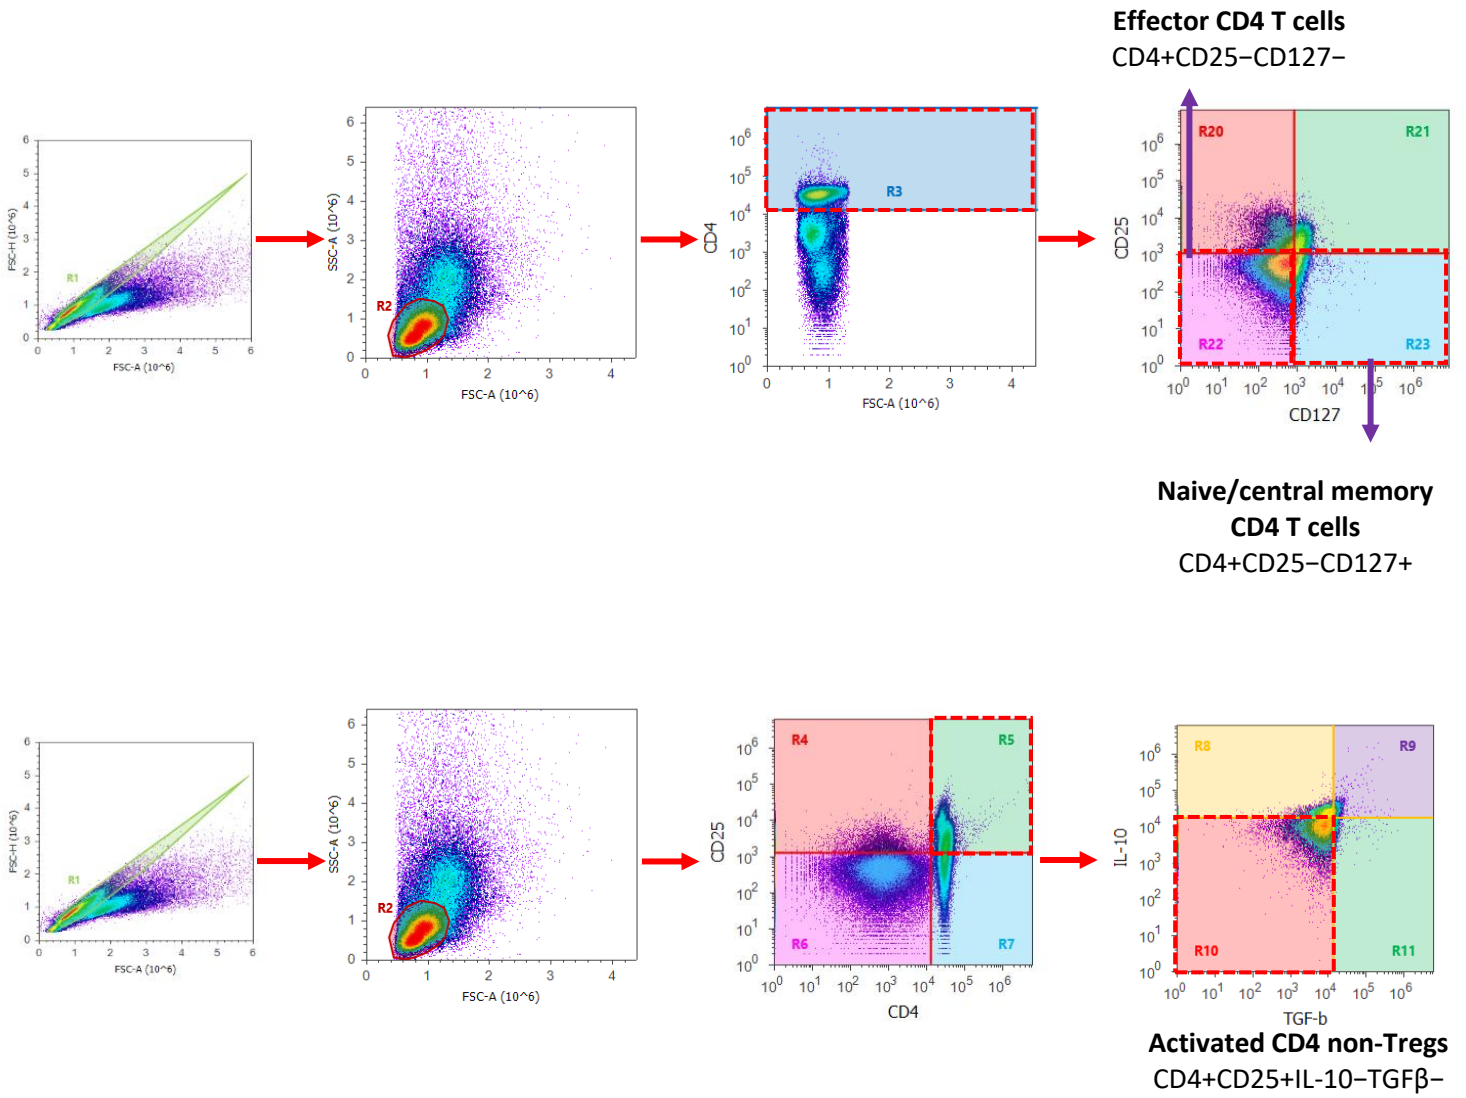

## B. CD8 T cells

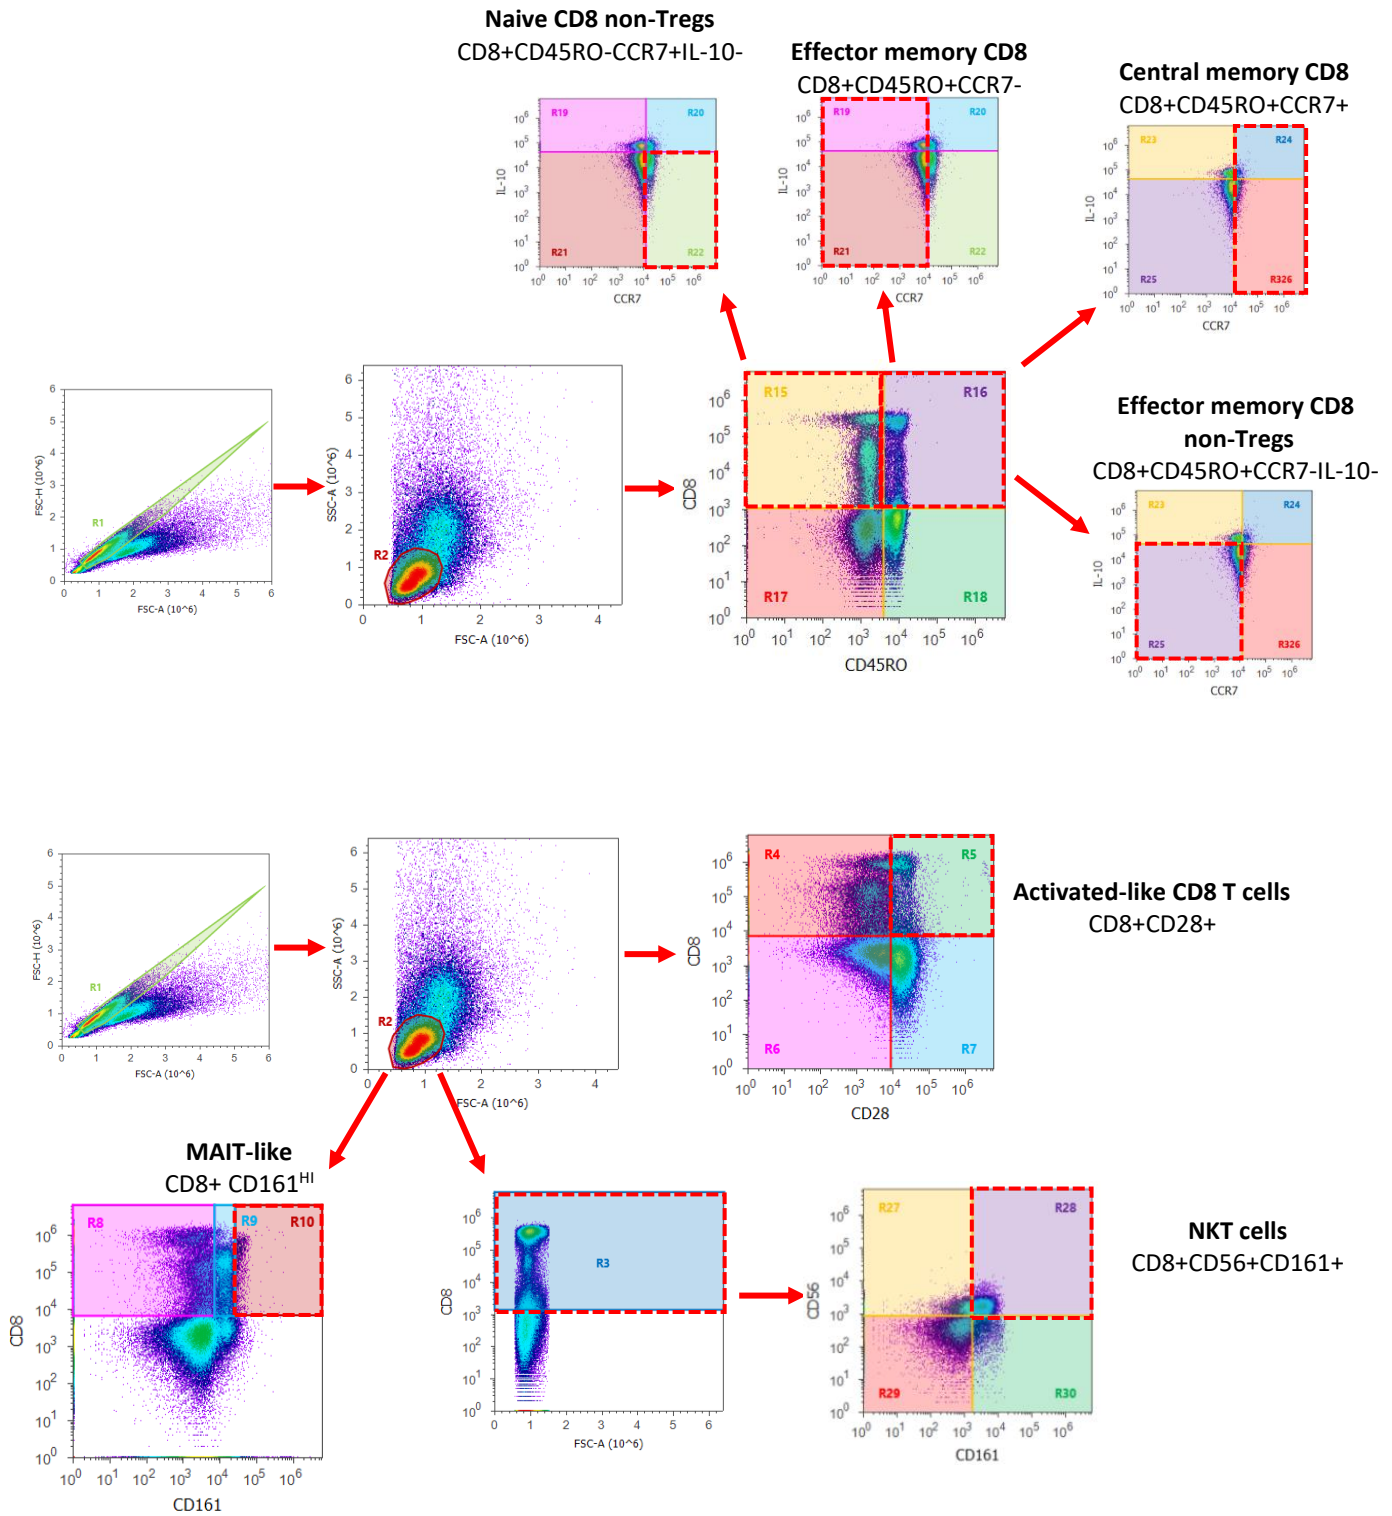

# C. CD8 T cytotoxic cells

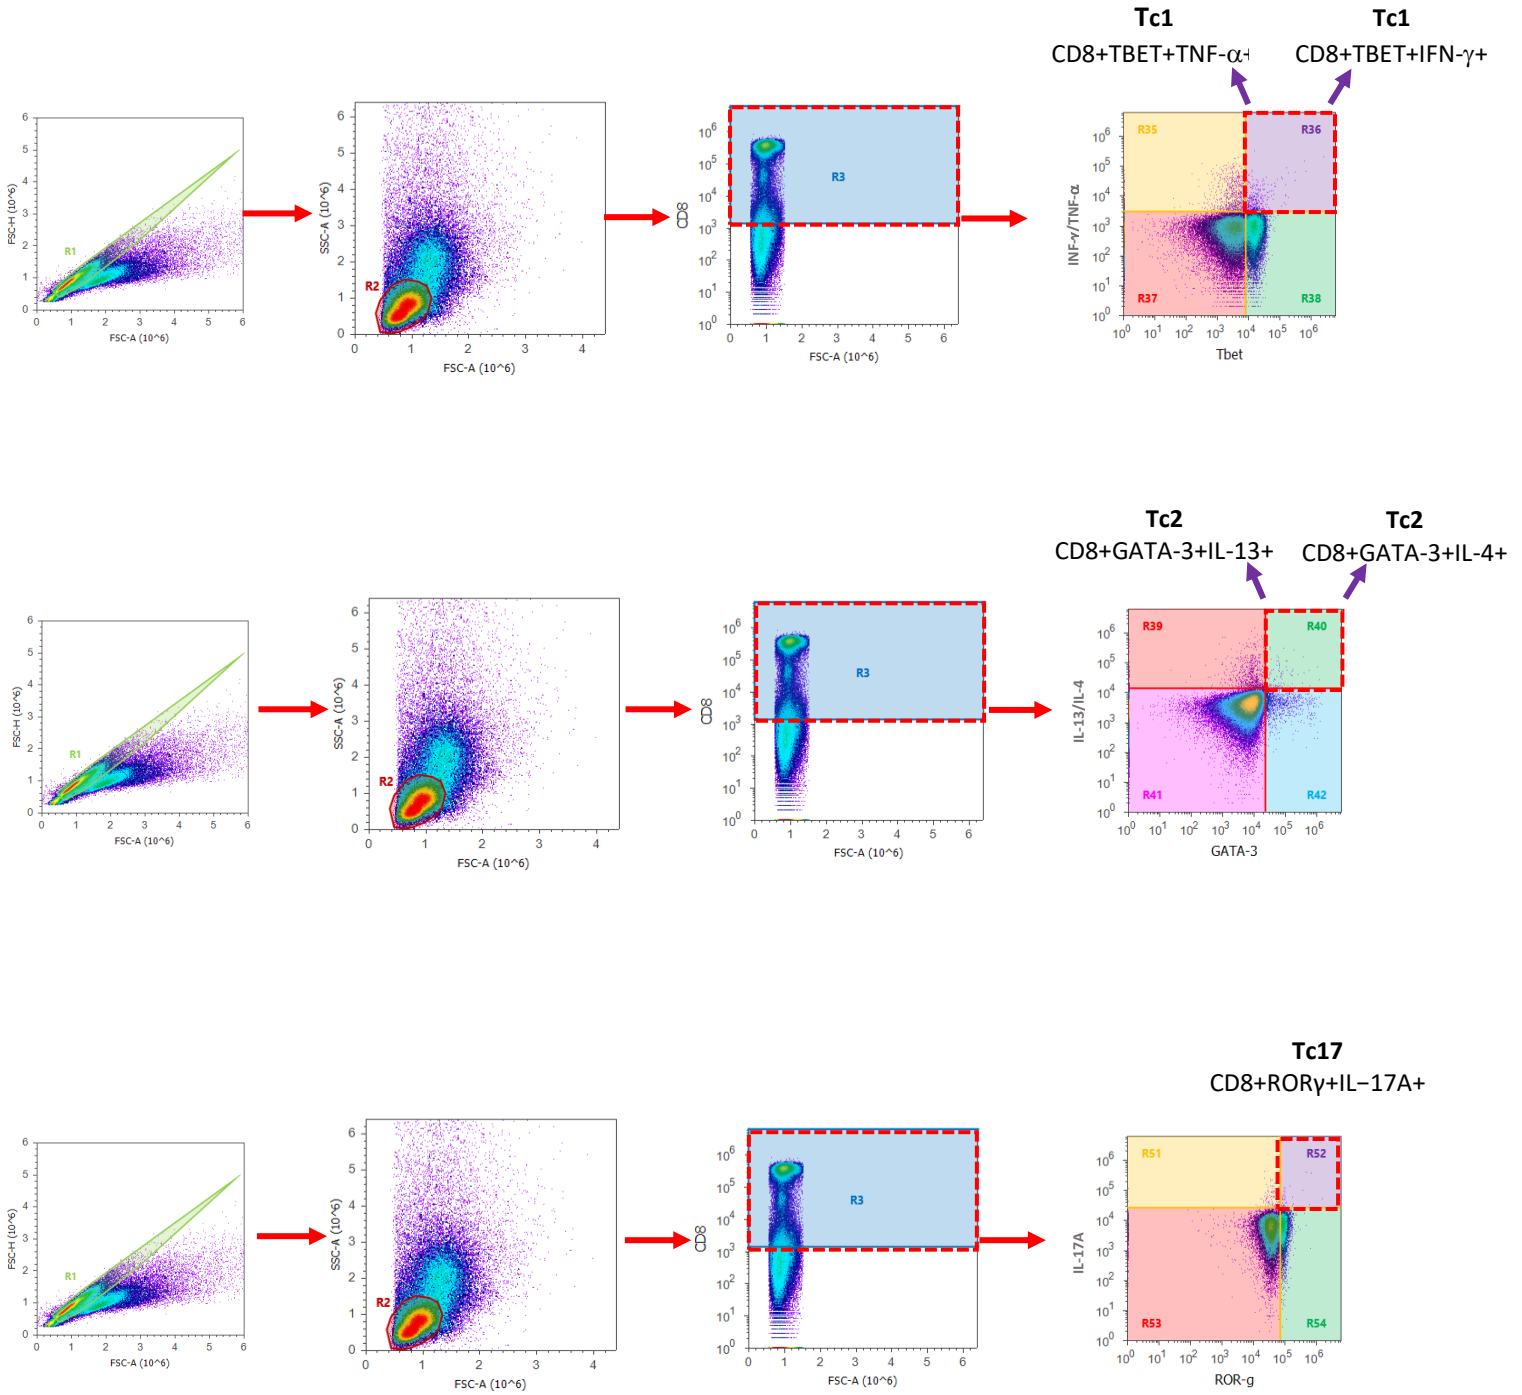

# D. B cells

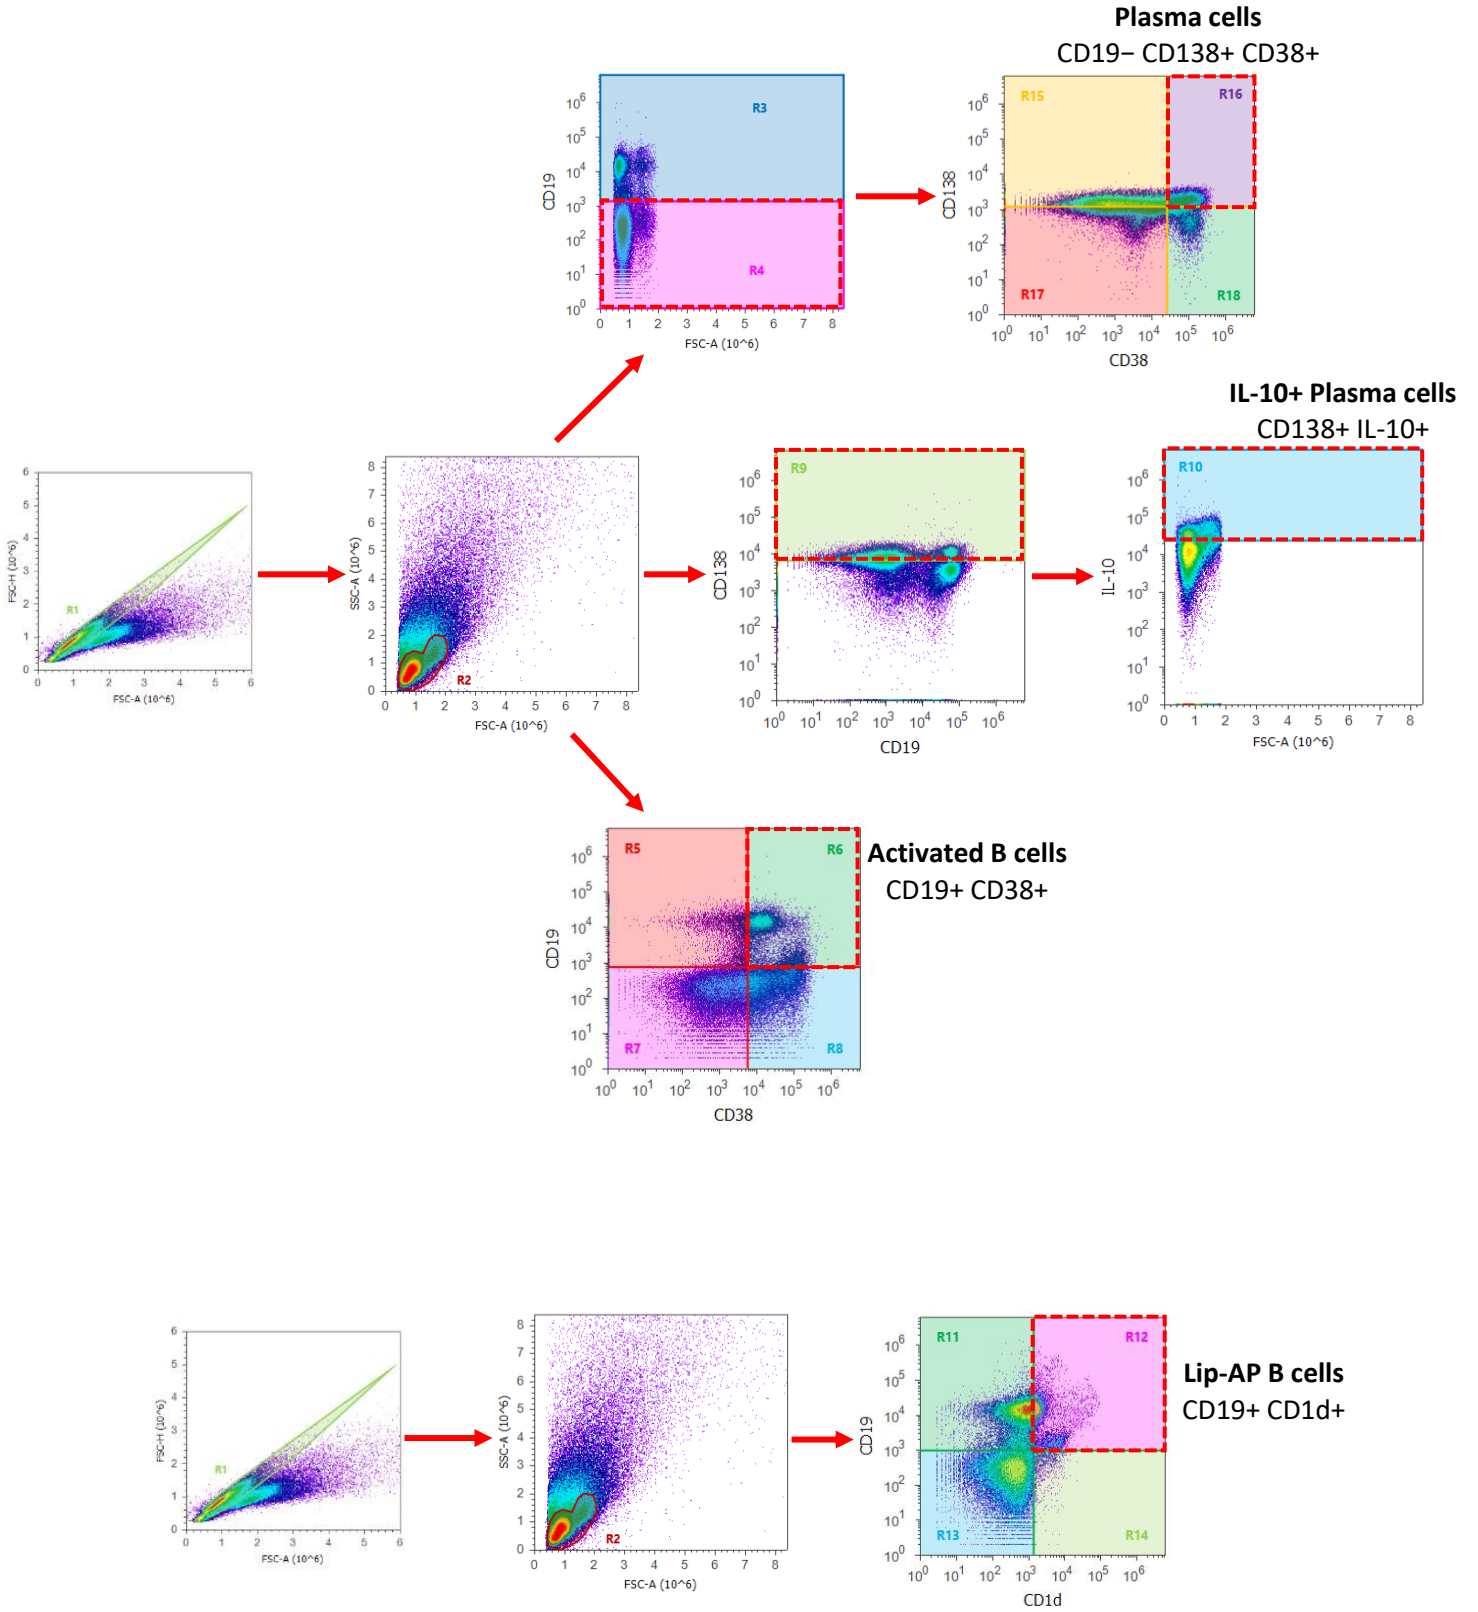

Supplement: 12967_2021_3055_MOESM3_ESM.pdf [file 12967_2021_3055_MOESM3_ESM.pdf]
