# Supplementary material for: Increased Tc17 cell levels and imbalance of naïve/effector immune response in Parkinson’s disease patients in a two-year follow-up: a case control study
Source: PubMed Central journal article supplement (PMC8422782; doi:10.1186/s12967-021-03055-2), 2021-09-06
Supplement: 12967_2021_3055_MOESM1_ESM.pdf [file 12967_2021_3055_MOESM1_ESM.pdf]

Supplementary Table 1. Cell populations analyzed by flow cytometry

| Cell population | Isotype                     | Antibody                           | Vol. Ab (μL) | #Reference |
|-----------------|-----------------------------|------------------------------------|--------------|------------|
| CD4 T Cells     | mouse IgG1k FITC            | CD127 FITC <sup>a</sup>            | 3.75         | 11-1278-42 |
|                 | rat IgG2ak PE               | IL-10 PE <sup>a*</sup>             | 5            | 12-7108-82 |
|                 | mouse IgG1k PerCP Cy5.5     | TGF-β PerCP Cy5.5 <sup>d*</sup>    | 5            | 349612     |
|                 | mouse IgG1k APC             | CD25 APC <sup>b</sup>              | 5            | 340939     |
|                 | mouse IgG1k APC Cy7         | CD4 APC Cy7 <sup>b</sup>           | 2.5          | 557871     |
| CD8 T Cells     | mouse IgG1k FITC            | CD56 FITC <sup>a</sup>             | 5            | 11-0566-42 |
|                 | mouse IgG1k FITC            | IFN-γ FITC <sup>a*</sup>           | 7.5          | BMS107FI   |
|                 | rat IgG2ak FITC             | CCR7 FITC <sup>a</sup>             | 5            | 11-1979-42 |
|                 | mouse IgG1k FITC            | IL-13 FITC <sup>a*</sup>           | 5            | 11-7139-42 |
|                 | mouse IgG1k FITC            | IL-17α FITC <sup>a*</sup>          | 3.75         | 11-7179-42 |
|                 | rat IgG2ak PE               | IL-10 PE <sup>a*</sup>             | 5            | 12-7108-82 |
|                 | mouse IgG1k PE              | Tbet PE <sup>a*</sup>              | 3.75         | 12-5825-82 |
|                 | mouse IgG1k PE              | IL-4 PE <sup>a*</sup>              | 5            | 12-7049-42 |
|                 | rat IgG2a PE                | ROR-γ PE <sup>a*</sup>             | 3.75         | 12-6988-82 |
|                 | mouse IgG2ak PerCP          | CD45RO PerCP <sup>c</sup>          | 5            | MHCD45RO31 |
|                 | IgG1 PerCP Cy5.5            | CD161 PerCP <sup>a</sup>           | 5            | 45-1619-42 |
|                 | mouse IgG1k PerCP Cy5.5     | TNF-α PerCP Cy5.5 <sup>a*</sup>    | 5            | 560679     |
|                 | rat IgG2bk PerCP eFluor 710 | GATA-3 PerCP <sup>a*</sup>         | 5            | 46-9966-42 |
|                 | mouse IgG1k APC             | CD8 APC <sup>a</sup>               | 2.5          | 17-0088-42 |
|                 | mouse IgG1k APC H7          | CD28 APC H7 <sup>b</sup>           | 3.75         | 561368     |
| B Cells         | mouse IgG1k FITC            | CD138 FITC <sup>a</sup>            | 5            | 11-1389-42 |
|                 | rat IgG2ak PE               | IL-10 PE <sup>a*</sup>             | 5            | 12-7108-82 |
|                 | mouse PerCP eFluor 710      | CD1d PerCP eFluor 710 <sup>b</sup> | 5            | 46-0016-42 |
|                 | mouse IgG1k APC             | CD38 APC <sup>a</sup>              | 3.75         | 17-0389-42 |
|                 | mouse IgG1k APC Cy7         | CD19 APC Cy7 <sup>b</sup>          | 2.5          | 557791     |

The antibodies used in this study were purchased from eBioscience (Waltham, MA, USA) (a), BD (Franklin Lakes, NJ, USA) (b), Invitrogen (Waltham, MA, USA) (c), and Biolegend (San Diego, CA, USA) (d); \*intracellular antibodies.
