# Supplementary material for: Increased Tc17 cell levels and imbalance of naïve/effector immune response in Parkinson’s disease patients in a two-year follow-up: a case control study
Source: PubMed Central journal article supplement (PMC8422782; doi:10.1186/s12967-021-03055-2), 2021-09-06
Supplement: 12967_2021_3055_MOESM2_ESM.pdf [file 12967_2021_3055_MOESM2_ESM.pdf]

Table 2. Phenotypes of CD4, CD8 T, and CD19 cells analyzed

| Phenotype                     | Name                                |
|-------------------------------|-------------------------------------|
| <b>CD4 T cells</b>            |                                     |
| CD4+CD25-CD127-               | Effector CD4 T cells[1]             |
| CD4+CD25+IL-10-TGF- $\beta$ - | Activated CD4 non-Tregs             |
| CD4+CD25-CD127+               | Naive/central memory CD4 T cells[1] |
| <b>CD8 T cells</b>            |                                     |
| CD8+CD28+                     | Activated-like CD8 T cells[2]       |
| CD8+CCR7-CD45RO+              | Effector memory CD8 T cells[3]      |
| CD8+CCR7+CD45O+               | Central memory CD8 T cells[3]       |
| CD8+CCR7-CD45RO+IL-10-        | Effector memory CD8 non-Tregs       |
| CD8+CCR7+CD45RO-IL-10-        | Naive CD8 non-Tregs                 |
| CD8+TBET+IFN- $\gamma$ +      | Tc1 cells[4]                        |
| CD8+TBET+TNF- $\alpha$ +      | Tc1 cells[4]                        |
| CD8+GATA3+IL-4+               | Tc2 cells[4]                        |
| CD8+GATA3+IL-13+              | Tc2 cells[4]                        |
| CD8+ROR- $\gamma$ +IL-17+     | Tc17 cells[4]                       |
| CD8+ROR- $\gamma$ +IL-6+      | Tc17 cells[4]                       |
| CD8+CD56+CD161+               | NKT cells[5]                        |
| CD8+CD161 <sup>HI</sup>       | MAIT-like [6]                       |
| <b>B cells</b>                |                                     |
| CD19-CD138+CD38+              | Plasma cells[7]                     |
| CD138+IL-10+                  | IL-10+ Plasma cells                 |
| CD19+CD1d+                    | Lip AP B cells                      |
| CD19+CD38+                    | Activated B cells[8]                |

Mucosal associated invariant T cells (MAIT); Lipid-antigen presenting (Lip AP);

## Bibliography

1. Dunham RM, Cervasi B, Brenchley JM, Albrecht H, Weintrob A, Sumpter B, et al. CD127 and CD25 Expression Defines CD4 + T Cell Subsets That Are Differentially Depleted during HIV Infection . The Journal of Immunology. 2008;180:5582-92.

2. Landay AL, Mackewicz CE, Levy JA. An activated CD8+ T cell phenotype correlates with anti-HIV activity and asymptomatic clinical status. *Clinical immunology and immunopathology*. United States; 1993;69:106–16.
3. Haegele KF, Stueckle CA, Malin J-P, Sindern E. Increase of CD8+ T-effector memory cells in peripheral blood of patients with relapsing-remitting multiple sclerosis compared to healthy controls. *Journal of neuroimmunology*. Netherlands; 2007;183:168–74.
4. Annunziato F, Romagnani C, Romagnani S. The 3 major types of innate and adaptive cell-mediated effector immunity. *Journal of Allergy and Clinical Immunology* [Internet]. Elsevier Ltd; 2015;135:626–35. Available from: <http://dx.doi.org/10.1016/j.jaci.2014.11.001>
5. Ohkawa T, Seki S, Dobashi H, Koike Y, Habu Y, Ami K, et al. Systematic characterization of human CD8+ T cells with natural killer cell markers in comparison with natural killer cells and normal CD8+ T cells. *Immunology*. 2001;103:281–90.
6. Fergusson JR, Fleming VM, Klenerman P. CD161-expressing human T cells. *Frontiers in Immunology*. 2011;2:1–7.
7. Garimalla S, Nguyen DC, Halliley JL, Tipton C, Rosenberg AF, Fucile CF, et al. Differential transcriptome and development of human peripheral plasma cell subsets. *JCI insight* [Internet]. American Society for Clinical Investigation; 2019;4:e126732. Available from: <https://pubmed.ncbi.nlm.nih.gov/31045577>
8. Liu Z, Zeng W, Huang X, Wang S, Zheng J, Pan M, et al. Peripheral CD19(hi) B cells exhibit activated phenotype and functionality in promoting IgG and IgM production in human autoimmune diseases. *Scientific reports*. 2017;7:13921.
