# Supplementary material for: Increased Tc17 cell levels and imbalance of naïve/effector immune response in Parkinson’s disease patients in a two-year follow-up: a case control study
Source: PubMed Central journal article supplement (PMC8422782; doi:10.1186/s12967-021-03055-2), 2021-09-06
Supplement: 12967_2021_3055_MOESM4_ESM.pdf [file 12967_2021_3055_MOESM4_ESM.pdf]

Supplementary Table 3. Levels of population markers. Comparison between patients and controls and patients with themselves at different times.

|      | Controls <sup>¢</sup> | PD-0yr <sup>¢</sup>                                  | PD-1yr <sup>¢</sup>                     | PD-2yr <sup>¢</sup>                     | PD-0yr<br>vs<br>PD-1yr | PD-0yr<br>vs<br>PD-2yr | PD-1yr<br>vs<br>PD-2yr |
|------|-----------------------|------------------------------------------------------|-----------------------------------------|-----------------------------------------|------------------------|------------------------|------------------------|
| CD4  | 39.05[29.03-45.04]    | 32.09[26.25-37.82]<br><i>P</i> = 0.0115 <sup>+</sup> | 37.42[27.41-44.00]<br><i>P</i> = 0.7451 | 40.06[29.74-44.31]<br><i>P</i> = 0.9770 | 0.0395 <sup>*</sup>    | 0.4922                 | 0.6953                 |
| CD8  | 33.75[25.96-38.63]    | 35.12[30.38-39.76]<br><i>P</i> = 0.3770              | 30.55[29.07-34.33]<br><i>P</i> = 0.5352 | 33.02[28.50-39.35]<br><i>P</i> = 0.9627 | 0.1324                 | 0.9219                 | 0.9219                 |
| CD19 | 18.04[13.19-21.75]    | 16.77[13.08-22.68]<br><i>P</i> = 0.8429              | 15.50[12.86-18.72]<br><i>P</i> = 0.1972 | 19.13[14.87-23.68]<br><i>P</i> = 0.6629 | 0.2247                 | 0.7695                 | 0.6250                 |

<sup>¢</sup> Data are reported as median and interquartile range [IQR]. Differences between patients and controls are shown below the median for each group. Differences between patients and themselves during the follow-up are shown in the tree last columns. PD-0yr (untreated Parkinson's disease patients), PD-1yr (patients treated for one year), PD-2yr (patients treated for two years). (\*) indicate significant differences between patient groups. (\*) indicates significant differences between patients and control subjects. *P* < 0.05 (\*); *P* < 0.005 (\*\*); *P* < 0.0005 (\*\*\*)).
