# Supplementary material for: Increased Tc17 cell levels and imbalance of naïve/effector immune response in Parkinson’s disease patients in a two-year follow-up: a case control study
Source: PubMed Central journal article supplement (PMC8422782; doi:10.1186/s12967-021-03055-2), 2021-09-06
Supplement: 12967_2021_3055_MOESM5_ESM.pdf [file 12967_2021_3055_MOESM5_ESM.pdf]

Supplementary Table 4. Changes in immune cell populations associated with age.

|                                                        | Control  |          | PD-0yr   |          | PD-1yr   |          | PD-2yr   |          |
|--------------------------------------------------------|----------|----------|----------|----------|----------|----------|----------|----------|
|                                                        | <i>P</i> | <i>r</i> | <i>P</i> | <i>r</i> | <i>P</i> | <i>r</i> | <i>P</i> | <i>r</i> |
| Effector CD4 T cells<br>CD4+CD25-CD127-                | 0.295    | 0.253    | 0.810    | 0.046    | 0.004**  | 0.599    | 0.578    | -0.201   |
| Naive/central memory<br>CD4 T cells<br>CD4+CD25-CD127+ | 0.184    | 0.253    | 0.703    | -0.072   | 0.039*   | -0.453   | 0.210    | 0.434    |
| Plasma cells<br>CD19-CD138+CD38+                       | 0.071    | -0.411   | 0.012*   | 0.461    | 0.754    | -0.075   | 0.957    | -0.019   |

Correlation between age and cell population levels. PD-0yr (untreated Parkinson's disease patients), PD-1yr (patients treated for one year), PD-2yr (patients treated for two years).  $P < 0.05$  (\*);  $P < 0.005$  (\*\*).
