# Supplementary material for: Increased Tc17 cell levels and imbalance of naïve/effector immune response in Parkinson’s disease patients in a two-year follow-up: a case control study
Source: PubMed Central journal article supplement (PMC8422782; doi:10.1186/s12967-021-03055-2), 2021-09-06
Supplement: 12967_2021_3055_MOESM6_ESM.pdf [file 12967_2021_3055_MOESM6_ESM.pdf]

Supplementary Table 5. Changes in T cytotoxic phenotypes in patients and the control group.

| Phenotype |                                                                | Controls <sup>c</sup> | PD-0yr <sup>c</sup>                   | PD-1yr <sup>c</sup>                   | PD-2yr <sup>c</sup>                   | PD-0yr<br>vs<br>PD-1yr<br>P-value | PD-0yr<br>vs<br>PD-2yr<br>P-value | PD-1yr<br>vs<br>PD-2yr<br>P-value |
|-----------|----------------------------------------------------------------|-----------------------|---------------------------------------|---------------------------------------|---------------------------------------|-----------------------------------|-----------------------------------|-----------------------------------|
| Tc1       | CD8 <sup>+</sup> TBET <sup>+</sup>                             | 55.53[46.88-72.16]    | 65.31[52.84-73.80]<br><i>P</i> =0.200 | 62.90[55.44-73.38]<br><i>P</i> =0.176 | 71.68[52.95-79.35]<br><i>P</i> =0.156 | 0.973                             | 0.432                             | 0.769                             |
|           | CD8 <sup>+</sup> TBET <sup>+</sup> IFN- $\gamma$ <sup>+</sup>  | 0.41[0.23-0.74]       | 0.40[0.25-0.74]<br><i>P</i> =0.102    | 0.21[0.07-0.36]<br><i>P</i> =0.802    | 0.11[0.07-0.14]<br><i>P</i> =0.024*   | 0.374                             | 0.004**                           | 0.009*                            |
|           | CD8 <sup>+</sup> TBET <sup>+</sup> TNF- $\alpha$ <sup>+</sup>  | 0.51[0.22-1.019]      | 0.50[0.36-0.85]<br><i>P</i> =0.801    | 0.31[0.18-0.87]<br><i>P</i> =0.375    | 0.29[0.17-0.39]<br><i>P</i> =0.034*   | 0.926                             | 0.064                             | 0.064                             |
| Tc2       | CD8 <sup>+</sup> GATA3 <sup>+</sup>                            | 4.39[3.69-7.07]       | 3.08[2.32-5.12]<br><i>P</i> =0.937    | 2.73[1.39-4.42]<br><i>P</i> =0.198    | 2.26[1.52-3.74]<br><i>P</i> =0.206    | 0.036*                            | 0.039*                            | 0.064                             |
|           | CD8 <sup>+</sup> GATA3 <sup>+</sup> IL-13 <sup>+</sup>         | 0.30[0.11-0.48]       | 0.30[0.15-0.61]<br><i>P</i> =0.937    | 0.21[0.09-0.31]<br><i>P</i> =0.198    | 0.15[0.05-0.18]<br><i>P</i> =0.206    | 0.007*                            | 0.027*                            | 0.436                             |
|           | CD8 <sup>+</sup> GATA3 <sup>+</sup> IL-4 <sup>+</sup>          | 0.20[0.09-0.58]       | 0.10[0.07-0.37]<br><i>P</i> =0.102    | 0.25[0.07-0.61]<br><i>P</i> =0.779    | 0.12[0.08-0.59]<br><i>P</i> =0.245    | 0.522                             | 0.164                             | 0.160                             |
| Tc17      | CD8 <sup>+</sup> ROR- $\gamma$ <sup>+</sup>                    | 29.81[24.26-38.73]    | 17.69[9.33-56.01]<br><i>P</i> =0.119  | 24.68[4.68-35.46]<br><i>P</i> =0.568  | 51.05[18.54-81.02]<br><i>P</i> =0.082 | 0.522                             | 0.375                             | 0.039*                            |
|           | CD8 <sup>+</sup> ROR- $\gamma$ <sup>+</sup> IL-17 <sup>+</sup> | 0.05[0.02-0.14]       | 0.07[0.03-0.16]<br><i>P</i> =0.427    | 0.03[0.01-0.04]<br><i>P</i> =0.009*   | 0.06[0.4-0.09]<br><i>P</i> =0.856     | 0.001**                           | 0.078                             | 0.250                             |

<sup>c</sup> Data are reported as median and interquartile range [IQR]. Differences between patients and controls are shown below the median for each group. Differences between patients and themselves during the follow-up are shown in the tree last columns. PD-0yr (untreated Parkinson's disease patients), PD-1yr (patients treated for one year), PD-2yr (patients treated for two years). (\*) indicate significant differences between patient groups or between a patient group and the control group. *P* < 0.05 (\*); *P* < 0.005 (\*\*); *P* < 0.0005 (\*\*\*) .
