# Supplementary material for: Increased Tc17 cell levels and imbalance of naïve/effector immune response in Parkinson’s disease patients in a two-year follow-up: a case control study
Source: PubMed Central journal article supplement (PMC8422782; doi:10.1186/s12967-021-03055-2), 2021-09-06

Supplementary Figure 2. Changes in immune populations during follow-up

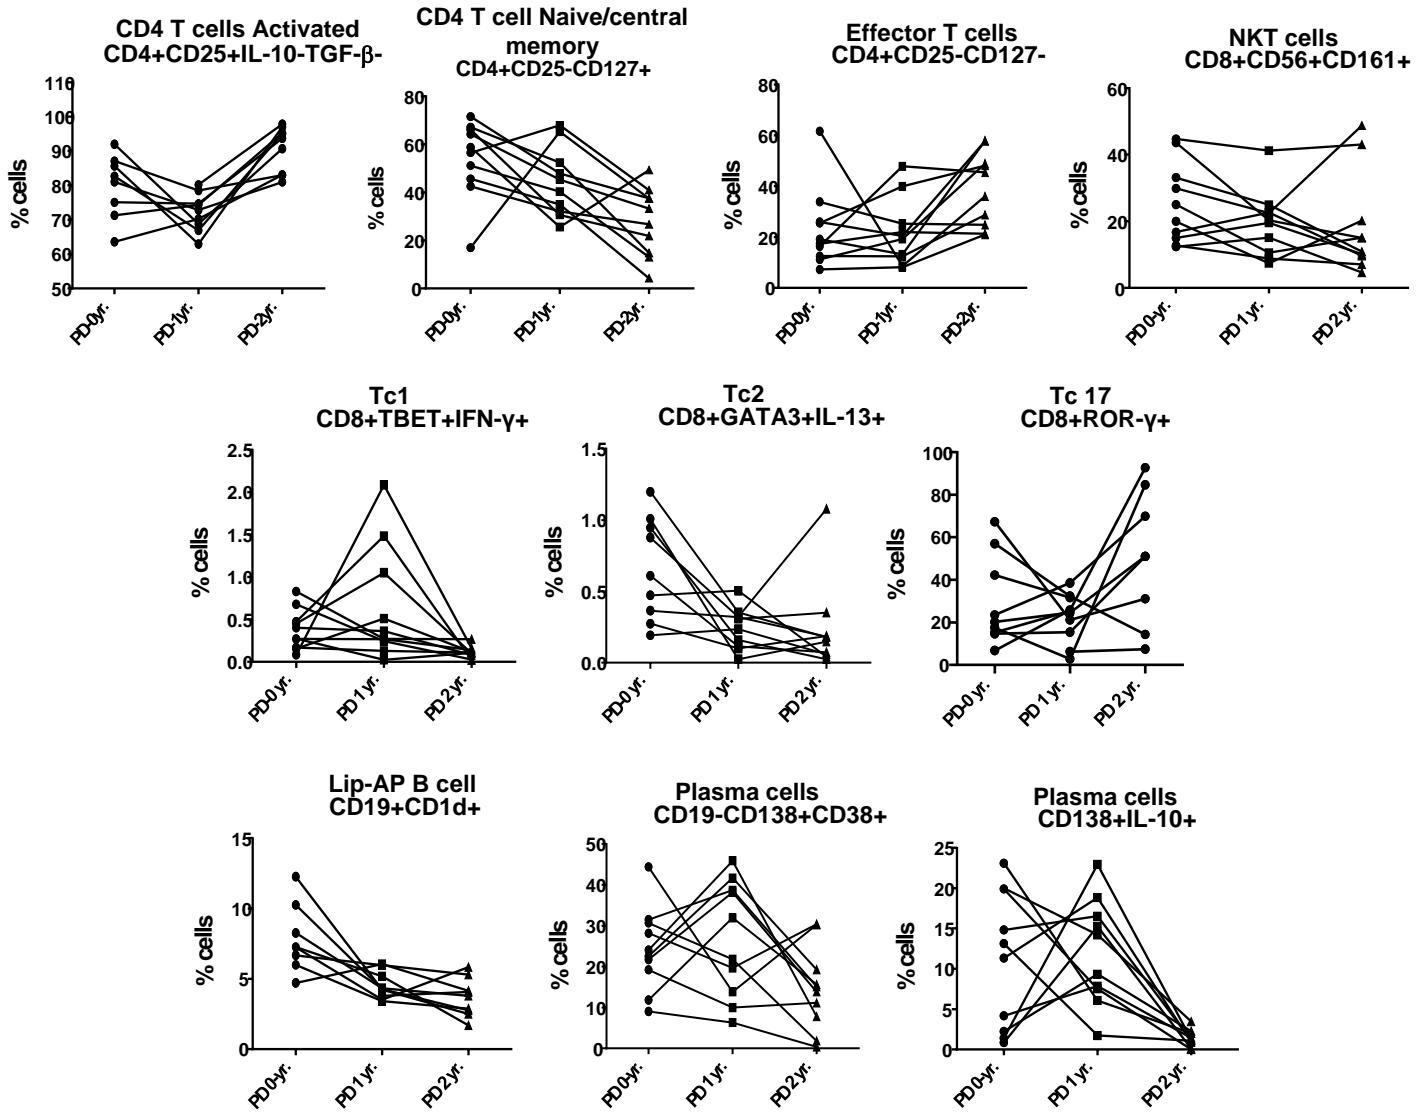

Supplement: 12967_2021_3055_MOESM7_ESM.pdf [file 12967_2021_3055_MOESM7_ESM.pdf]
